# Supplementary material for: Epidemiological Characteristics and Factors Associated with Alzheimer’s Disease and Mild Cognitive Impairment among the Elderly in Urban and Rural Areas of Hubei Province
Source: MDPI journal article supplement (doi:10.3390/jcm12010028), 2022-12-20
Supplement: s1 [file s1]

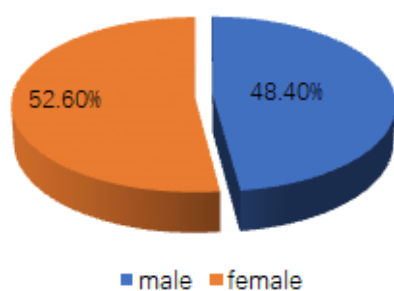

**Figure S1.** Gender composition of the sample

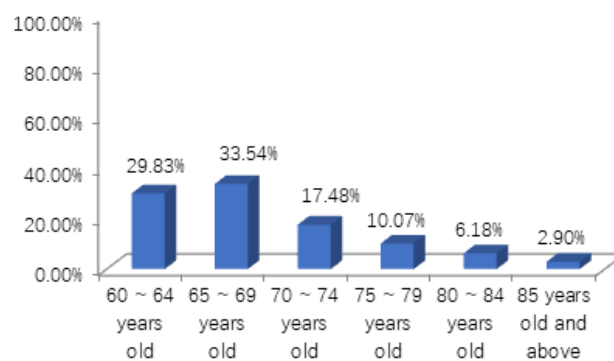

**Figure S2.** Age composition of the sample

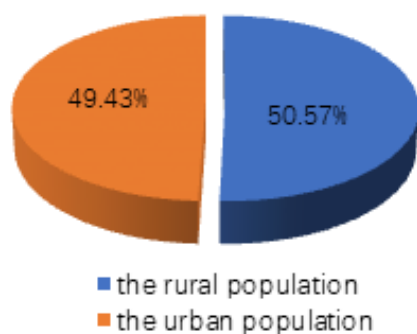

**Figure S3.** Regional composition of the sample

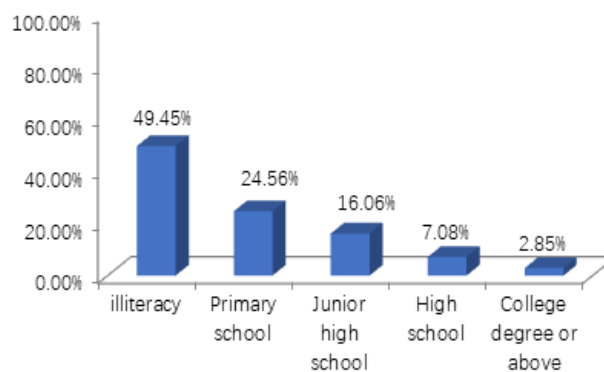

**Figure S4.** Education level of the sample

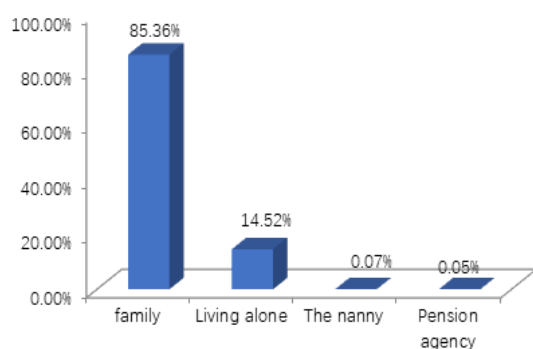

**Figure S5.** Residential situation of the sample

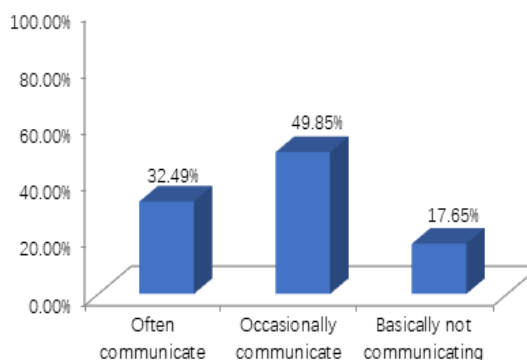

**Figure S6.** Communication between the participants and their children

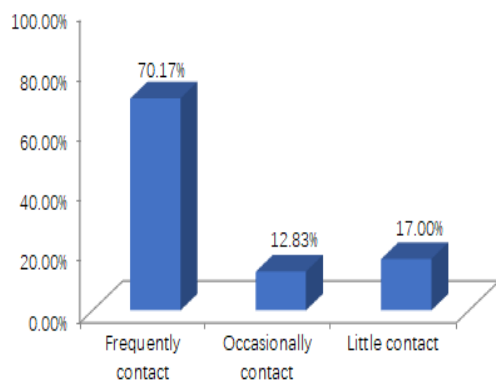

**Figure S7.** The interaction between the participants and their neighbours

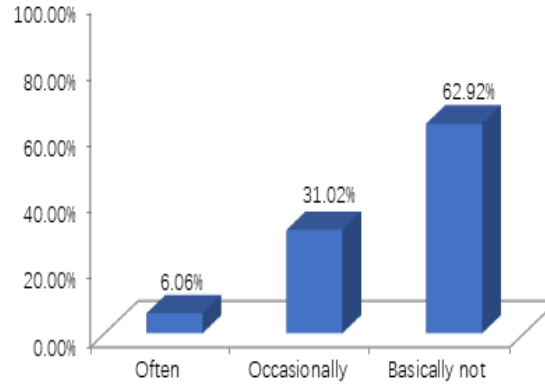

**Figure S8.** Participants' participation in social activities

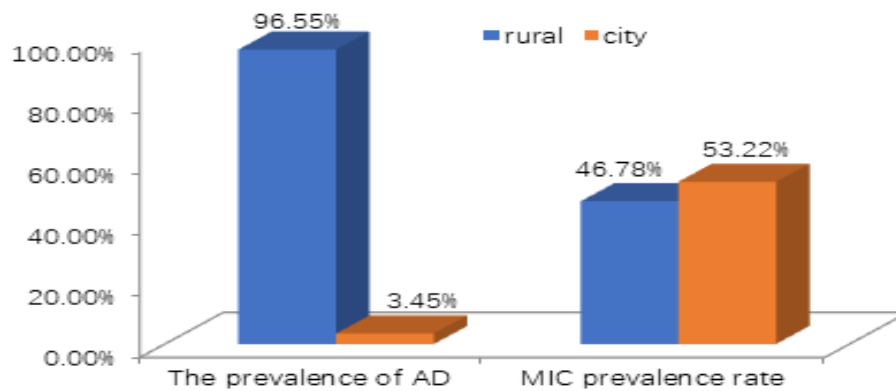

**Figure S9.** The proportion of patients with AD and MCI in different regions

**Table S1.** MMSE scores of AD patients

| MMSE (points) | Cases (n) | The proportion (%) |
|---------------|-----------|--------------------|
| 0~3           | 5         | 8.6                |
| 4~6           | 6         | 10.3               |
| 7~9           | 16        | 27.6               |
| 10~12         | 14        | 24.1               |
| 13~15         | 7         | 12.1               |
| 16~18         | 10        | 17.2               |
| Total         | 58        | 100                |

**Table S2.** MMSE scores of MCI patients

| MMSE (points) | Cases (n) | The proportion (%) |
|---------------|-----------|--------------------|
| 1~11          | 50        | 12.38              |
| 12~14         | 41        | 10.15              |
| 15~17         | 49        | 12.13              |
| 18~20         | 77        | 19.06              |
| 21~23         | 89        | 22.03              |
| 24~26         | 98        | 24.26              |
| Total         | 404       | 100                |

**Table S3.** Influence of social connections and life events on AD

| Variable               | $\beta$ | $sx$  | $\chi^2$ | $P$   | $OR$ (95% $CI$ ) |
|------------------------|---------|-------|----------|-------|------------------|
| Children Communication | -0.344  | 0.235 | 2.144    | 0.143 | 0.71 [0.45,1.12] |
| Neighbour interaction  | -0.376  | 0.179 | 4.435    | 0.035 | 0.69 [0.48,0.97] |
| Social activities      | 0.000   | 0.259 | 0.000    | 1.000 | 1.00 [0.60,1.66] |
| Working conditions     | -0.105  | 0.324 | 0.105    | 0.746 | 0.90 [0.48,1.70] |
| Living situation       | -0.483  | 0.344 | 1.979    | 0.159 | 0.62 [0.31,1.21] |

**Table S4.** Influence of social connections and life events on MCI

| Variable               | $\beta$ | $sx$  | $\chi^2$ | $P$   | $OR$ (95% $CI$ ) |
|------------------------|---------|-------|----------|-------|------------------|
| Children Communication | -0.276  | 0.092 | 8.974    | 0.003 | 0.76 [0.63,0.91] |
| Neighbour interaction  | 0.303   | 0.113 | 7.165    | 0.007 | 1.35[1.09,1.70]  |
| Social activities      | -0.257  | 0.118 | 4.749    | 0.029 | 0.77 [0.61,0.97] |
| Working conditions     | 0.147   | 0.151 | 0.953    | 0.329 | 1.16 [0.86,1.56] |
| Living situation       | -0.167  | 0.205 | 0.665    | 0.415 | 0.85 [0.57,1.26] |

**Table S5.** Influence of lifestyle behaviours on AD

| Variable          | $\beta$ | $sx$  | $\chi^2$ | $P$   | $OR$ (95% $CI$ ) |
|-------------------|---------|-------|----------|-------|------------------|
| Regular check-up  | -0.676  | 0.308 | 4.819    | 0.028 | 0.51 [0.28,0.93] |
| Smoking           | 0.441   | 0.204 | 4.675    | 0.031 | 1.55 [1.04,2.32] |
| A cup of tea      | -1.667  | 0.771 | 4.684    | 0.030 | 0.19 [0.04,0.85] |
| Drinking          | -0.237  | 0.314 | 0.569    | 0.451 | 0.79 [0.43,1.46] |
| Physical activity | 0.081   | 0.229 | 0.127    | 0.722 | 1.09 [0.69,1.70] |

**Table S6.** Influence of lifestyle behaviours on MCI.

| Variable          | $\beta$ | $sx$  | $\chi^2$ | $P$   | $OR$ (95% $CI$ ) |
|-------------------|---------|-------|----------|-------|------------------|
| Sleep             | 0.791   | 0.152 | 27.147   | 0.001 | 2.21 [1.64,2.97] |
| Drinking          | 0.299   | 0.124 | 5.841    | 0.016 | 1.35 [1.06,1.72] |
| Physical activity | -0.115  | 0.098 | 1.373    | 0.241 | 0.89 [0.74,1.08] |
| A cup of tea      | 0.185   | 0.184 | 1.014    | 0.314 | 1.20 [0.84,1.73] |
| Smoking           | 0.036   | 0.12  | 0.09     | 0.764 | 1.04 [0.82,1.31] |

**Table S7.** Influence of somatic diseases on AD

| Variable                     | $\beta$ | $sx$  | $\chi^2$ | $P$   | $OR$ (95% $CI$ )  |
|------------------------------|---------|-------|----------|-------|-------------------|
| Hypertension                 | 0.060   | 0.315 | 0.036    | 0.850 | 1.06 [0.57,1.97]  |
| Diabetes                     | -0.948  | 1.061 | 0.798    | 0.372 | 0.39 [0.05,3.10]  |
| Coronary heart disease (CHD) | 0.119   | 0.537 | 0.049    | 0.825 | 1.13 [0.39,3.23]  |
| Stroke                       | -3.595  | 2.911 | 1.525    | 0.217 | 0.03 [0.00,8.25]  |
| Chronic bronchitis           | 0.249   | 0.484 | 0.265    | 0.607 | 1.28 [0.50,3.31]  |
| Asthma                       | 0.693   | 1.225 | 0.320    | 0.571 | 2.00 [0.18,22.07] |

|                      |        |       |       |       |                    |
|----------------------|--------|-------|-------|-------|--------------------|
| Tuberculosis (TB)    | 0.000  | 1.179 | 0.000 | 1.000 | 1.00 [0.10,10.07]  |
| Arthritis            | 0.301  | 0.684 | 0.194 | 0.659 | 1.35 [0.35,5.17]   |
| Cervical spondylosis | 0.089  | 0.469 | 0.036 | 0.849 | 1.09 [0.44,2.74]   |
| Disc herniation      | -1.654 | 1.040 | 2.528 | 0.112 | 0.19 [0.03,1.47]   |
| Deaf                 | -3.346 | 3.584 | 0.872 | 0.350 | 0.04 [0.00,39.55]  |
| The tumor            | -3.346 | 4.389 | 0.581 | 0.446 | 0.04 [0.00,191.75] |

**Table S8.** Influence of somatic diseases on MCI

| <b>Variable</b>              | <b><math>\beta</math></b> | <b><i>sx</i></b> | <b><math>\chi^2</math></b> | <b><i>P</i></b> | <b><i>OR (95% CI)</i></b> |
|------------------------------|---------------------------|------------------|----------------------------|-----------------|---------------------------|
| Coronary heart disease (CHD) | 0.819                     | 0.235            | 12.118                     | 0.001           | 2.27 [1.43,3.60]          |
| Stroke                       | 0.442                     | 0.247            | 3.208                      | 0.073           | 1.56 [0.96,2.52]          |

**Table S9.** Influence of hobbies on AD

| <b>Variable</b>   | <b><math>\beta</math></b> | <b><i>sx</i></b> | <b><math>\chi^2</math></b> | <b><i>P</i></b> | <b><i>OR (95% CI)</i></b> |
|-------------------|---------------------------|------------------|----------------------------|-----------------|---------------------------|
| Reading           | -1.761                    | 0.911            | 3.736                      | 0.053           | 0.17 [0.03,1.03]          |
| Chess             | -1.882                    | 0.896            | 4.408                      | 0.036           | 0.15 [0.03,0.88]          |
| Surf the Internet | -1.766                    | 2.488            | 0.504                      | 0.478           | 0.17 [0.00,22.43]         |

**Table S10.** Influence of hobbies on MCI

| <b>Variable</b>   | <b><math>\beta</math></b> | <b><i>sx</i></b> | <b><math>\chi^2</math></b> | <b><i>P</i></b> | <b><i>OR (95% CI)</i></b> |
|-------------------|---------------------------|------------------|----------------------------|-----------------|---------------------------|
| Reading           | -0.738                    | 0.259            | 8.097                      | 0.004           | 0.48 [0.29,0.80]          |
| Chess             | -0.318                    | 0.19             | 2.818                      | 0.093           | 0.73 [0.50,1.06]          |
| Surf the Internet | -0.212                    | 0.199            | 1.137                      | 0.286           | 0.81 [0.55,1.20]          |
